# Supplementary material for: Experimental Investigation of Shale Tensile Failure under Thermally Conditioned Linear Fracturing Fluid (LFF) System and Reservoir Temperature Controlled Conditions
Source: MDPI journal article supplement (doi:10.3390/polym14122417), 2022-06-14
Supplement: s1 [file s1]

# Experimental Investigation of Shale Tensile Failure under Thermally Conditioned Linear Fracturing Fluid (LFF) System and Reservoir Temperature Controlled Conditions

Cajetan Chimezie Iferobia <sup>1</sup>, Maqsood Ahmad <sup>1,\*</sup> and Imtiaz Ali <sup>1,2</sup>

<sup>1</sup> Department of Petroleum Engineering, Universiti Teknologi PETRONAS, 32610 Seri Iskandar, Perak Darul Ridzuan, Malaysia; cajetan\_17007975@utp.edu.my (C.C.I.); imtiaz\_17003333@utp.edu.my (I.A.)

<sup>2</sup> Department of Petroleum and Gas Engineering, BUITEMS, 87300 Quetta, Balochistan, Pakistan

\* Correspondence: maqsood.ahmad@utp.edu.my

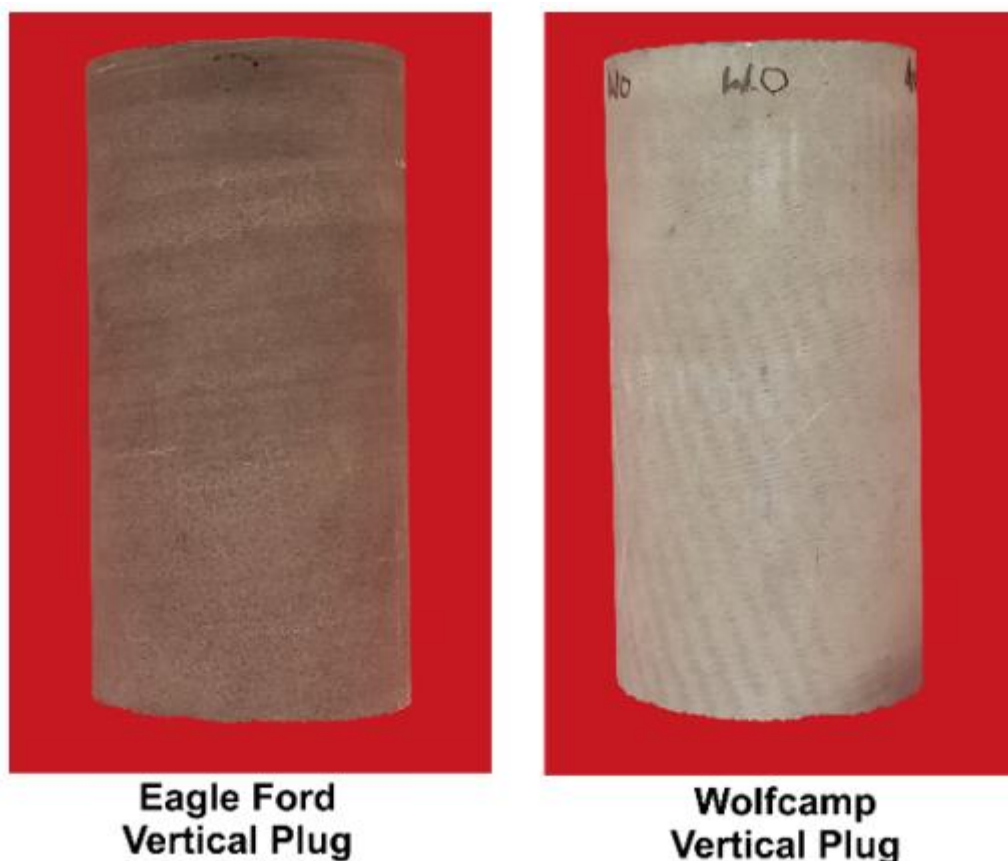

**Figure S1.** Cylindrically shaped vertical plugs of Eagle Ford and Wolfcamp shales used in construction of disc-shaped samples for Brazilian Indirect Tensile Strength testing.

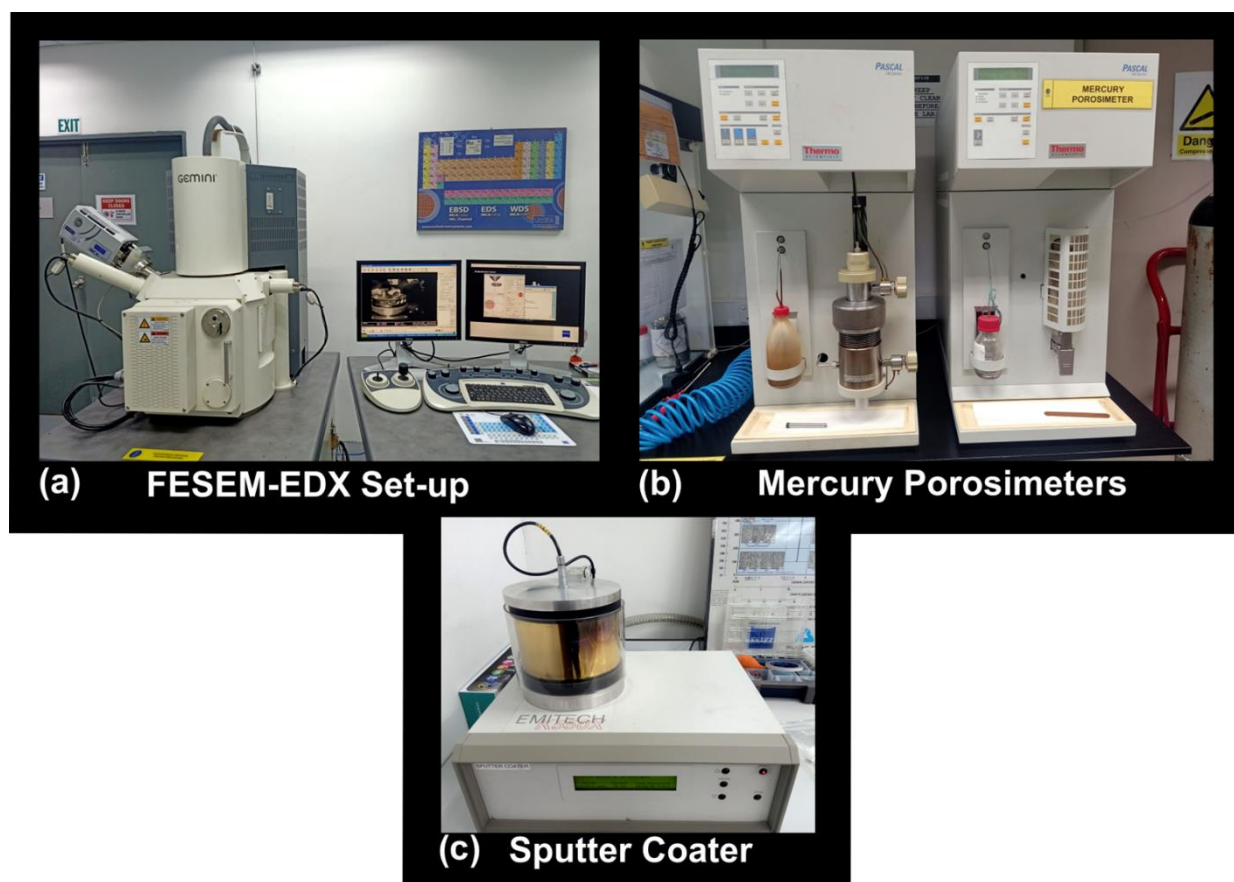

**Figure S2.** (a) FESEM-EDX set-up for mineralogical characterization and elemental composition analysis, (b) 140 & 240 Series Mercury Porosimeters for porosity-permeability analysis, and (c) Sputter coater for metallic coating of sample splits to aid conductive layering.

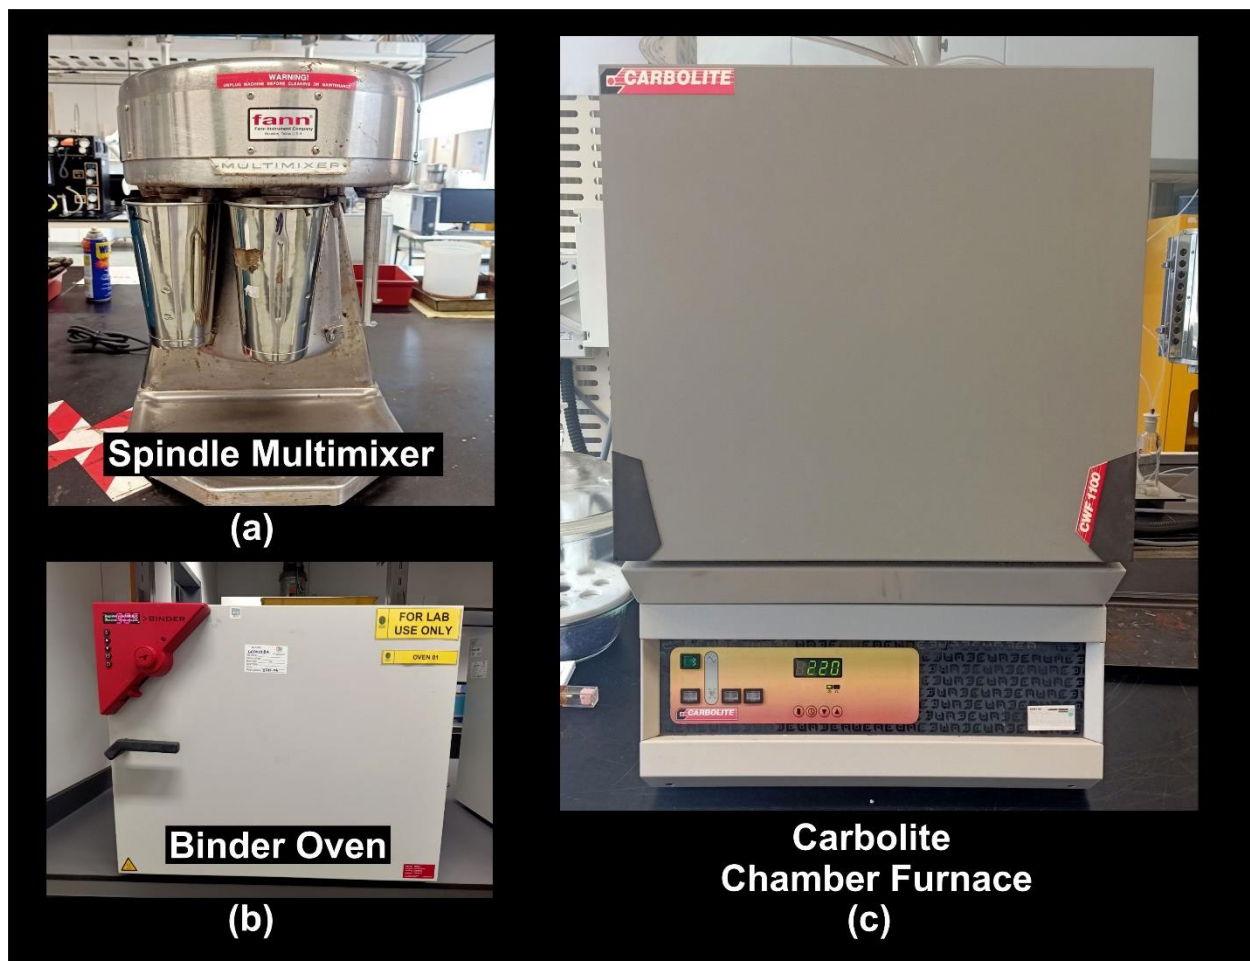

**Figure S3.** Experimental set-up of (a) Model 9B 5-Spindle Multimixer to facilitate homogeneous dissolution of chemical additives, (b) Binder oven for thermal conditioning of samples at 90 °C, and (c) Carbolite chamber furnace for thermal conditioning of samples at 220 °C .

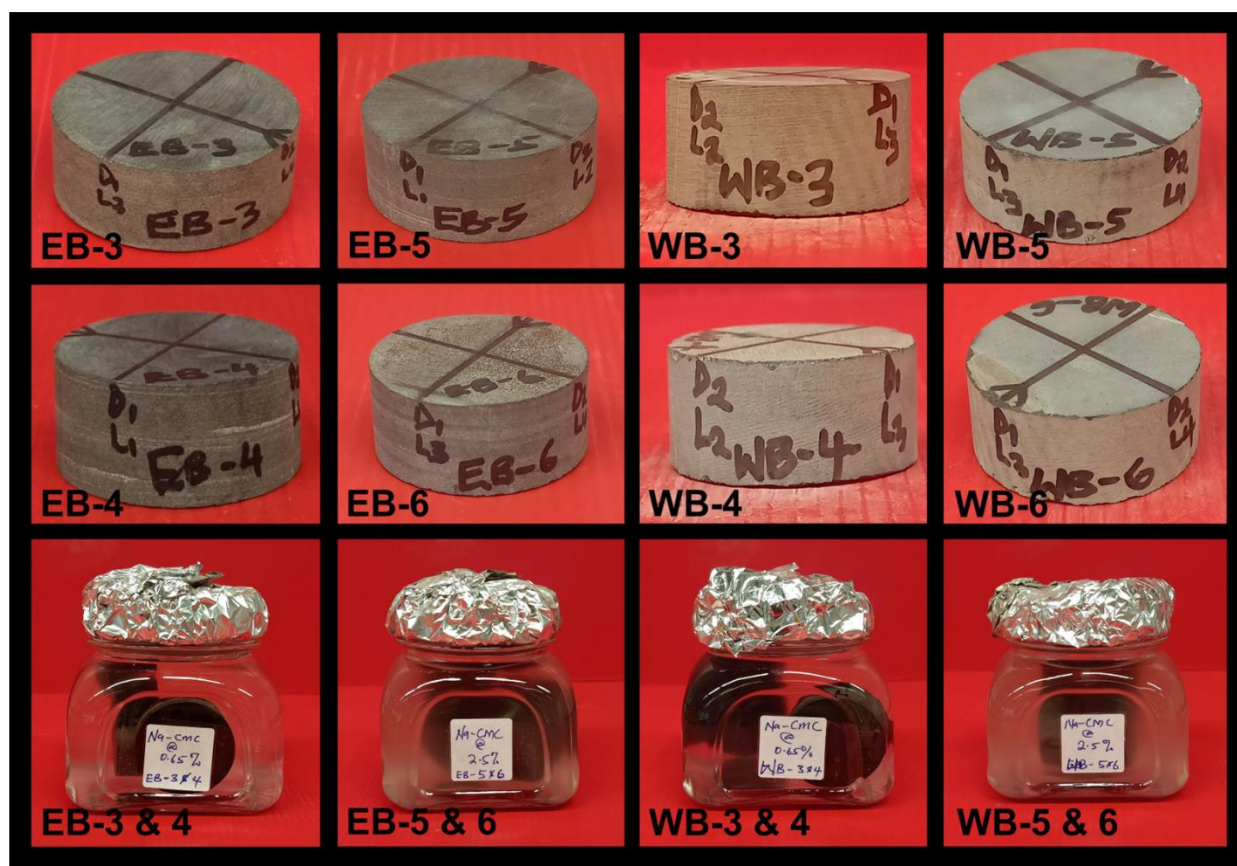

**Figure S4.** Brazilian disc-shaped samples of Eagle Ford and Wolfcamp shales placed uprightly in pairs in borosilicate glass containers and filled with linear fracturing fluids of polymer concentrations at 0.65 and 2.50% in preparation for thermal conditioning. The borosilicate glass containers were covered with aluminum foils and afterwards were tightly sealed with metallic lids before placement for thermal conditioning.

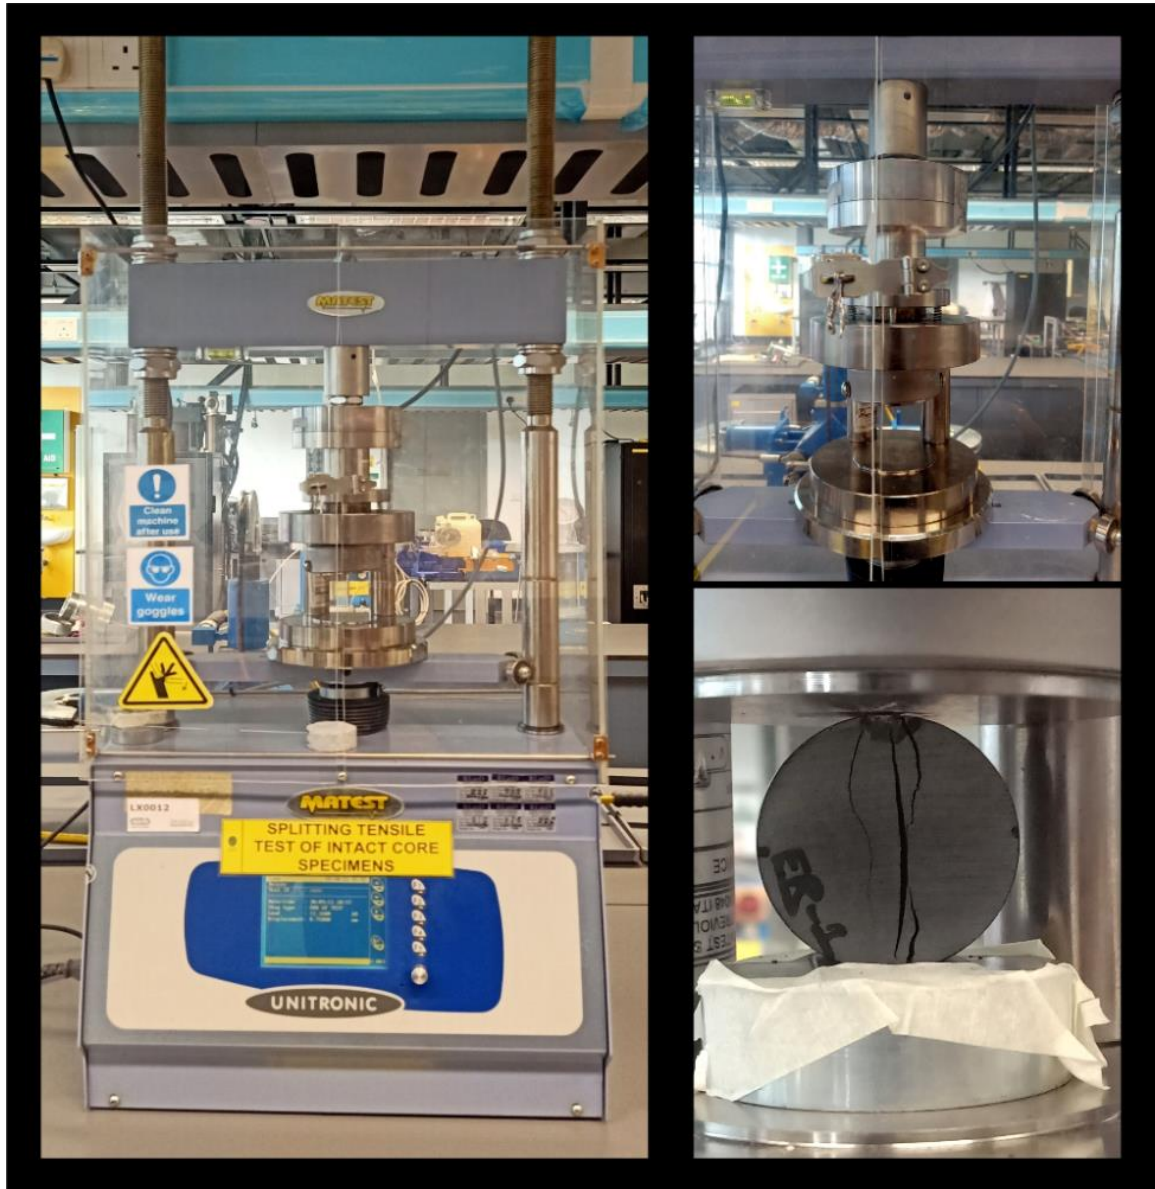

**Figure S5.** Brazilian indirect tensile strength testing equipment set up with disc-shaped sample of Eagle Ford shale held between loading platens with diameter-concentrated compressional loading applied to failure.
